# Supplementary material
Source: PubMed Central journal article supplement (PMC3912967)
Supplement: supp_2013.088211_2013.088211.An_suppl.pdf [file supp_2013.088211_2013.088211.An_suppl.pdf]

# Chromosome 1q21 gains confer inferior outcomes in multiple myeloma treated with bortezomib but copy number variation and percentage of plasma cells involved have no additional prognostic value

Gang An,<sup>1</sup> Yan Xu,<sup>1</sup> Lihui Shi,<sup>1</sup> Shizhen, Zhong,<sup>1</sup> Shuhui Deng,<sup>2</sup> Zhenqing Xie,<sup>1</sup> Weiwei Sui,<sup>1</sup> Fenghuang Zhan,<sup>3</sup> and Lugui Qiu<sup>1,2</sup>

<sup>1</sup>Department of Lymphoma and Myeloma, Institute of Hematology and Blood Diseases Hospital, State Key Laboratory of Experimental Hematology, Chinese Academy of Medical Sciences and Peking Union of Medical College, Tianjin, China; <sup>2</sup>Umbilical Cord Blood Bank of Tianjin, China; and <sup>3</sup>Department of Internal Medicine, Division of Hematology, Oncology, and Blood and Marrow Transplantation, University of Iowa, Iowa City, IA, USA

---

©2013 Ferrata Storti Foundation. This is an open-access paper. doi:10.3324/haematol.2013.088211

Manuscript received on March 17, 2013. Manuscript accepted on August 8, 2013.

Correspondence: drqiu99@medmail.com.cn

Table S1: Patient characteristics in arm A and arm B

| Characteristic                                                                                              | No. of patients/total no. (%) |
|-------------------------------------------------------------------------------------------------------------|-------------------------------|
| <b>Age (years)</b>                                                                                          |                               |
| Median                                                                                                      | 57.0                          |
| Range                                                                                                       | 30-73                         |
| <b>M component at diagnosis, %</b>                                                                          |                               |
| IgG                                                                                                         | 44/107(41.1)                  |
| IgA                                                                                                         | 32/107(29.9)                  |
| IgD                                                                                                         | 5/107(4.7)                    |
| Light chain                                                                                                 | 21/107(19.6)                  |
| Non-secretory                                                                                               | 5/107(4.7)                    |
| <b>β2- microglobulin</b>                                                                                    |                               |
| <5.5mg/dl                                                                                                   | 52/107(48.6)                  |
| ≥5.5mg/dl                                                                                                   | 55/107(51.4)                  |
| <b>Cytogenetic abnormalities, %</b>                                                                         |                               |
| 1q21 gains                                                                                                  |                               |
| At least 3 copies of 1q21                                                                                   | 68/102(66.7)                  |
| 3 copies of 1q21                                                                                            | 41/102(40.2)                  |
| At least 4 copies of 1q21                                                                                   | 27/102(26.5)                  |
| del(13q)                                                                                                    | 59/107(55.1)                  |
| del(17p)                                                                                                    | 25/107(23.4)                  |
| IGH translocation                                                                                           | 69/104(66.3)                  |
| t(11;14)                                                                                                    | 15/101(14.9)                  |
| t(4;14)                                                                                                     | 33/100(33.0)                  |
| t(14;16)                                                                                                    | 3/98(3.1)                     |
| High-risk[any t(4;14), t(14;16), or del(17p)]                                                               | 51/100(51.0)                  |
| <b>Treatment</b>                                                                                            |                               |
| Thalidomide-based therapy                                                                                   | 44/107(41.1)                  |
| Bortezomib-based therapy                                                                                    | 63/107(58.9)                  |
| Abbreviations: ISS, International Staging System; Ig, immunoglobulin; DS, Durie Salmon; NS, no significant; |                               |
